1     **Including Phylogenetic Conservatism of Shortgrass Prairie Restoration Species Does Not**  
2                                     **Improve Species Germinability Prediction**

3

4                     Yanni Chen<sup>1</sup>, Dylan W. Schwilk<sup>1</sup>, Robert D. Cox<sup>2</sup>, Matthew G. Johnson<sup>1</sup>

5

6     <sup>1</sup>Department of Biological Sciences, Texas Tech University, 2901 Main Street, Lubbock, Texas 79409, USA

7     <sup>2</sup>Department of Natural Resources Management, Texas Tech University, Lubbock, TX 79410, USA

8

9

10    **ABSTRACT**

11    PREMISE

12             We investigated whether phylogenetic conservatism can improve the performance of seed  
13    germinability prediction models. Previous studies in tallgrass prairie and alpine meadow revealed  
14    that seed morphological traits demonstrate phylogenetic conservatism. We hypothesized that  
15    phylogenetic conservatism in seed traits could help predict the seed germinability, under the  
16    assumption that seed traits contain phylogenetic signals.

17    METHODS

18             We measured seed germination percentage and seed morphological traits (seed mass,  
19    seed height, and seed surface area) on 34 native species from shortgrass prairie in North  
20    America. We supplemented these data with similar data from the literature on 11 more species.  
21    We calculated the robustness of the phylogenetic signal of each trait to the number of species  
22    sampled. We also compressed the phylogenetic distance matrix to a two-dimensional space, and

23 applied the Akaike information criterion to evaluate the effects of phylogeny on seed  
24 germinability prediction models.

## 25 KEY RESULTS

26 We found weak but significant phylogenetic signals in seed mass and seed height in the  
27 full data set. These phylogenetic signals were not able to improve seed germinability prediction  
28 model performance among shortgrass prairie species. Our robustness tests of phylogenetic  
29 signals using random sub-sampling showed that the detection rate of phylogenetic signals in seed  
30 mass was increased along with the expansion of species pool, and nearly 100% at 40 species.  
31 However, the detection rate of phylogenetic signals in seed height was constantly low, around  
32 20%.

## 33 CONCLUSIONS

34 When the phylogenetic signals are weak, the phylogenetic position does not improve  
35 germinability prediction model performance. Therefore, phylogenetic signals detected during a  
36 single species pool calculation may not accurately reflect the phylogenetic conservatism of the  
37 trait in a plant community. We suggest testing for robustness of phylogenetic signals using  
38 random sub-sampling tests.

39

40 **Keywords:** ecological restoration, seed germinability prediction, phylogenetic comparative  
41 method, phylogenetic conservatism, phylogenetic signal

42

## 43 **Introduction**

44           The need for ecological restoration is constantly increasing. For example, the September  
45 2014 United Nations Climate Summit suggested the need for 350 million hectares to be restored  
46 worldwide by 2030 (Bonn Challenge, <https://www.bonnchallenge.org/>). Tremendous numbers of  
47 native species will be needed to meet this need. Most ecological restoration projects select only a  
48 small number of species out of the community species list to conduct ecological restoration  
49 (Kiehl *et al.* 2010). Given the low numbers of species selected for any specific restoration  
50 project, maximizing the benefit from selected species is key. Thus, ensuring that the selected  
51 species have high final germination percentages is a high priority because seed germination  
52 ranks as one of the top restoration challenges (Larson *et al.* 2015). Therefore, lab assessment  
53 formulas to narrow down the restoration species list could aid species selection in many  
54 restoration projects.

55           Seed dormancy regulates seed germination but is complicated and hard to predict. In over  
56 90% of species, seeds dry and start primary dormancy by the time of harvest (Finch-Savage and  
57 Leubner-Metzger 2006; Subbiah *et al.* 2019). After dispersal, seeds can have secondary  
58 dormancy, a shallow physiological dormancy which is broken by responses to environmental  
59 cues (Finch-Savage and Leubner-Metzger 2006). Multiple categorical seed dormancy types are  
60 widely represented in plant species, including morphological dormancy (MD), physical  
61 dormancy (PY), physiological dormancy (PD), and morphophysiological dormancy (MPD;  
62 (Baskin and Baskin 1998). Physiological dormancy is thought to be the ancestral state of seed  
63 dormancy and also serves as the diversification hub for different dormancy types (Willis *et al.*  
64 2014). Considering the complexity of dormancy stages and the lengthy experiments needed to

65 distinguish these types (Finch-Savage and Leubner-Metzger 2006), it is desirable to predict seed  
66 germinability success through other related traits.

67         Low germination rate hinders restoration and, given limited resources, managers desire to  
68 only include species with predictably high germination rates. Several seed traits are related to  
69 seed germination and might serve as more easily measured predictors of final germination  
70 percentage. In general, mass is a good indicator of seed germination, as small seeds tend to  
71 germinate faster (Westoby *et al.* 2002a; Barak *et al.* 2018), while large seeds can stay dormant  
72 longer and produce stronger seedlings after germination (Leishman *et al.* 2000; Westoby *et al.*  
73 2002a). The rationale behind this phenomenon is related to nutrition stored in the seed under  
74 either a “larger-seed-later-deployment” interpretation (Ganade and Westoby 1999; Leishman *et*  
75 *al.* 2000; Kidson and Westoby 2000) or “cotyledon functional morphology” hypothesis (Hladik  
76 and Miquel 1990; Kitajima 1996a, b). Furthermore, seed size and seed shape are also traits  
77 influencing seed germination by stimulating or delaying seed germination through wind, water,  
78 or animal dispersal (Howe and Smallwood 1982). Large seeds generally have advantages for  
79 dispersal related to entrapment strategies, such as net trapping, surface tension, and wake  
80 trapping (Jager *et al.* 2019), especially for wind-dispersed species (Zhu *et al.* 2019). Specifically,  
81 seed morphological traits influence both seed primary dispersal (seed departure from parent  
82 plants) and secondary wind dispersal (seed lifting off the ground by wind power) (Zhu *et al.*  
83 2019). Primary dispersal is mainly driven by dispersal height and terminal falling velocity, which  
84 are influenced by seed morphology (Sheldon and Burrows 1973; Jongejans and Telenius 2001).  
85 Secondary dispersal distance strongly depends on the lift-off velocity, which is influenced by  
86 seed height and seed surface area (van Tooren 1988; Schurr *et al.* 2005; Zhu *et al.* 2022). There  
87 are many other seed physiological traits associated with seed germination that are not commonly

88 tested, such as base water potential, cardinal temperature, thermal time and hydrothermal time  
89 for germination (Bradford 2002; Hardegree *et al.* 2013).

90       Seed germination trials are time consuming, therefore, predicting germinability for  
91 species without conducting such trials could benefit restoration. Seed morphology traits are  
92 potential predictors of germination rate. If dormancy and lack thereof are evolutionarily  
93 conserved, then it may be possible to predict seed germination rate of unmeasured species based  
94 on the rates of closely related taxa. A phylogenetic tree models the inferred evolutionary  
95 branching history of a group of taxa (Baum and Smith 2013). A phylogenetically conserved trait  
96 will tend to be most similar among species close together on the phylogenetic tree. The common  
97 test for such phylogenetic signals is Blomberg's K (Blomberg *et al.* 2003, Revell 2008), but it is  
98 also possible to include all pairwise phylogenetic distances among taxa in linear models through  
99 the method of phylogenetic residuals (Revell 2010). Phylogenetic trait conservatism is common  
100 across many traits and clades (Bu *et al.* 2016, Barak *et al.* 2018, Duncan *et al.* 2019). Adding  
101 phylogenetic residuals to the generalized least square model can take the evolution of  
102 unmeasured traits into account and improve the prediction model's accuracy. This work has two  
103 major goals. The first goal is to test whether adding phylogenetic information among species  
104 (presented by x-y coordinates transferred from phylogenetic tree topology) can improve  
105 predictions of germination rate based on seed morphology. Adding phylogenetic information  
106 might improve predictions if the germination rate shows a phylogenetic signal or if the seed  
107 morphology effect on germination rate interacts with phylogeny. There is precedent for using  
108 phylogeny for this purpose: In a study of species native to tallgrass prairie, Barak *et al.* (2018)  
109 confirmed that adding the phylogenetic residual improved the accuracy of the seed germinability  
110 prediction model due to the phylogenetic conservatism in both seed germination and

111 morphological traits. However, because phylogenetic tools are unfamiliar and inaccessible to  
112 restoration practitioners and due to a historical separation between evolutionary biology and  
113 applied ecology, phylogenetic methods have not been broadly applied to restoration practice  
114 (Hipp *et al.* 2015).

115         The second major goal of this work is to determine how the size of a sample of taxa from  
116 an ecological community influences the power to detect phylogenetic signals in traits. The  
117 sample size and combination of given species influence tree topology and branch length during  
118 phylogenetic signal calculation. In empirical examples, the detection of phylogenetic signals is  
119 strongly related with the number of species included, with twenty or more species usually  
120 considered sufficient for estimation of Blomberg's K (Blomberg *et al.* 2003) . However, in  
121 phylogenetic comparative analysis aimed at answering evolutionary questions, the combination  
122 of species is commonly fixed. For applied restoration use, the practitioner will need to measure  
123 traits on some sample of species from a particular community. By examining how this sample of  
124 taxa influences the calculation of Blomberg's K, we aim to provide guidelines for estimating the  
125 robustness of this calculation.

126         To address these two major goals and test the potential role of phylogeny for improving  
127 restoration practice, we asked four research questions: 1) Do seed traits and seed final  
128 germination percentages exhibit phylogenetic signals? 2) Among seed traits, which one is the  
129 best predictor of seed final germination percentage? 3) Does including phylogenetic residuals  
130 improve the seed germinability prediction? 4) Do the sampling size and species composition  
131 influence phylogenetic conservatism detection in shortgrass prairie species?

132

133 **Material and Methods:**

134 To determine the relationship between seed germinability and seed morphological traits,  
135 we measured seed germination percentage, seed mass, seed height, and seed surface area in 45  
136 species which are native to the shortgrass prairie of North America (Table 1, Figure 1). All of  
137 our raw data and calculations were demonstrated in our interactive Shiny Application (Figure 2,  
138 [https://chenyanniii.shinyapps.io/Phylo\\_Compar\\_Traits/](https://chenyanniii.shinyapps.io/Phylo_Compar_Traits/)).

139

#### 140 Seed Germination Percentage and Morphological Traits Measurements

141 Seed germination percentage was obtained from two sources: our own germination trials  
142 and previous publications. In all cases, we defined “germination percentage” as the maximum  
143 final germination percentage obtained. The germination trials followed a simple germination  
144 protocol without cold stratification or other attempts to break dormancy, which simulated  
145 minimum requirements for restoration projects. This simple protocol is essentially a  
146 measurement of lack of dormancy assuming the tested seeds were full viable. For 34 of the 45  
147 species, we conducted new germination trials. Our new germination trials were trying to simulate  
148 the scenario that practitioners want to find some easy to use native species. Because the  
149 experiment is trying to simulate the scenario in which practitioners are attempting to find easy to  
150 use native species, we bought seeds from a local restoration seed vendor (Native American  
151 Seed), and chose species for which they offered local seed sources (and recorded the seed  
152 source), with seeds that were harvested less than 6 years ago. When seeds arrived, we stored the  
153 seeds in a dry and dark place at room temperature (20 °C) until experiments started. Although  
154 it’s possible that some species may exhibit dormancy, we didn’t use any dormancy breaking  
155 treatment, in order to simulate simple restoration practice. For the germination experiment, we  
156 used triple replicated germination trials: disposable petri dishes with lids were placed in

157 germination chambers (20 °C day and night, with 15 hours and 9 hours day night shift). Inside a  
158 petri dish a piece of filter paper was placed to observe auto-claved water to keep the seeds moist.  
159 We checked the water sufficiency every day. In each germination trial we split a total of 50 seeds  
160 of each species into 5 petri dishes. Since our study used commercial seeds and focused on  
161 species dormancy status, we assumed our seeds will either be dormant or start germination  
162 within a month. Our observations during experiments proved this assumption. The seeds  
163 generally started germinating within 10 days or stayed dormant through the whole germination  
164 trial. Our germination trials ran until one week after the last seed germinated. Most of the seed  
165 germination trials finished within a month, and all the trials finished within two months. Three  
166 independent trials happened in July 2019, September 2019, and November 2019. For the  
167 remaining 11 species, we used final germination percentages reported in two published studies  
168 (Schwilk and Zavala 2012; Chou *et al.* 2012). These two studies were originally designed for  
169 detecting smoke effects on shortgrass prairie species, but we used the control treatment data only  
170 which provided conditions similar to those in our trials (20-25 °C, 12-16 hours illumination).

171         We measured seed mass using an electronic balance (Sartorius Analytical Balance LA  
172 230P, 0.1mg readability) in lab conditions with 10 replicates of 100 seeds each per species. For  
173 species in which we could not obtain 100 seeds, we used 30 seeds per replicate.

174         We measured seed surface area and seed height through digital image processing with 10  
175 replicates. The seed surface was defined by the two largest orthogonal axes, the height was  
176 defined as the third axis. We calculated the seed surface area by digital image of the maximum  
177 surface area of seeds and imaged under a stereomicroscope at 400 magnification. We  
178 transformed the images to 8-bit (black and white) and calculated the surface area using the



179 “analyze particle” function in ImageJ (Schindelin et al. 2012). We also recorded the seeds’  
180 heights calculated by the z-stack image function and NIS-Element BR 4.60.00 software.

181

## 182 Species Phylogenetic Information

183 We generated a phylogenetic tree of all study species using two methods: pruning  
184 existing phylogeny (Zanne et al. 2014) and binding non-existing tips to the phylogeny based on  
185 their taxonomic information. The phylogeny (Zanne et al. 2014) we used in this study was a  
186 time-calibrated maximum-likelihood-based phylogenetic tree, built with seven genes (18S  
187 rDNA, 26S rDNA, ITS, matK, rbcL, atpB, and trnL-F) downloaded from GenBank. First, we  
188 confirmed that every genus in our study was on the Zanne phylogeny. Second, we created a  
189 function to prune species which were not on the tree, and we also swapped the species under the  
190 same genus if the exact species was not on the tree (see the function of `func_prun_replac` on  
191 <https://github.com/chenyanniii/Traits4> repo for more detail). The results showed that 30 species  
192 on the tree and 15 missing species (*Argemone albiflora*, *Asclepias asperula*, *Astragalus*  
193 *crassicaarpus*, *Callirhoe leiocarpa*, *Centaurea americana*, *Chasmanthium latifolium*, *Corydalis*  
194 *curvisiliqua*, *Digitaria californica*, *Eragrostis trichodes*, *Herbertia lahue*, *Liatris mucronata*,  
195 *Linum rigidum*, *Pavonia lasiopetala*, *Polytaenia nuttallii*, *Tradescantia occidentalis*). After  
196 applying `func_prun_replac`, 13 of 15 species were placed based in their genus and only two  
197 species (*Callirhoe leiocarpa* and *Digitaria californica*) were missing. Thus, we added the  
198 missing species (*Callirhoe leiocarpa* and *Digitaria californica*) as sister tips to *Callirhoe*  
199 *involucrate* and *Digitaria ciliaris* under the same genus assuming that phylogenetic relationships  
200 were consistent with their taxonomic grouping. Our final tree contained all species was a  
201 dichotomous tree (Figure 1).

202 To incorporate phylogenetic relatedness in the general linear models, we represented the  
203 phylogeny by all pairwise phylogenetic distances across taxa. We converted the pairwise  
204 distance matrix to points distributed in a two-dimensional coordinate system, using nonmetric  
205 multidimensional scaling (NMDS) (isoMDS function in the package MASS, Venables and Ripley  
206 2002). We evaluated phylogenetic signals for individual traits as Blomberg's K (Blomberg *et al.*  
207 2003) using the phylosig function in the phytools R package (Revell 2012). We tested for  
208 phylogenetic signal using a randomization test (phylosig function) that compared the measured  
209 value of Blomberg's K against a distribution of K calculated when trait values were randomized  
210 across the tips of the phylogeny.

211

#### 212 Germinability Prediction Model Selection

213 To generate and evaluate generalized linear models, we applied backward stepwise model  
214 comparison based on the Akaike information criterion (Akaike 1998) using the AICc function in  
215 the AICcmodavg package (Mazerolle 2020). We also used seed germination percentage, three  
216 seed morphological traits (seed mass, seed height and seed surface area) and phylogenetic  
217 positions to generate a global general linear model. Then, we used AIC to correct for small  
218 sample sizes (AICc) and evaluate the fitness of models. We standardized all input parameters to  
219 the mean of zero to produce standardized coefficients between parameters for numeric reasons in  
220 fitting. We also tested correlation among morphological traits (seed mass, seed height and seed  
221 surface area). All original data and scripts that we used to calculate phylogenetic signals,  
222 phylogenetic residuals, and seed germinability prediction models are available on GitHub  
223 website (<https://github.com/chenyanniii/Traits4>, DOI: 10.5281/zenodo.6609175).

224

## 225 Random Sub-sampling of Different Species Pool Size

226           To estimate the minimum species pool size for obtaining a stable phylogenetic signal, we  
227 created 31 different species pool subsets, from 10 species to 40 species. For each pool size, we  
228 randomly withdrew 100 times at each pool size species from the whole species pool, thus  
229 generating 100 sub-pools of each species pool size by random sub-sampling. The phylogenetic  
230 signals of each sub-pool were calculated for their Blomberg's K and related p value. We  
231 analyzed the relationship between sample size and detection rate of phylogenetic signals was  
232 analyzed to evaluate the effect of sample size to estimated phylogenetic signals in traits.

233

## 234 Shiny Application

235           Shiny is a web framework for displaying data. Shiny is a good data processing  
236 demonstration tool, an interactive way for users to experience how different input and procedure  
237 affect output. We designed our shiny application to import with our full dataset and display data  
238 analysis and results. Users can see our full dataset result (as default), or interactively calculate all  
239 parameters for any sub-pools using checkboxes of species (Figure 2).

240

## 241 **Results**

242           In this study, we used 45 commonly selected restoration species to explore the  
243 phylogenetic distance among shortgrass prairie species by pruning unnecessary species and  
244 adding desired species to the existing phylogenetic tree of flowering plants (Figure 1).

245

## 246 Seed Final Germination Percentage and Morphological Traits Measurements

247           When examining species' trait value with the phylogenetic tree (Figure 1), we found the  
248 phylogenetic patterns in seed mass, seed height, seed surface area and seed germination rate were  
249 varied. We were not able to germinate eight species (Figure 1, *Argemone albiflora*, *Callirhoe*  
250 *leiocarpa*, *Corydalis curvisiliqua*, *Herbertia lahue*, *Oenothera rhombipetala*, *Pavonia*  
251 *lasiopetala*, *Phytolacca americana*, and *Polytaenia nuttallii*). *Eragrostis trichodes* had the  
252 highest final germination percentage, 82%. For seed mass, *Sporobolus airoides* had the lightest  
253 weight per seed,  $0.0945 \pm 0.0083$  mg per seed; the heaviest seed was *Pavonia lasiopetala*,  $18.75$   
254  $\pm 0.3487$  mg per seed. The seed height measurement ranged from  $0.658 \pm 0.1051$  (*Coreopsis*  
255 *tinctoria*) to  $2.995 \pm 0.1334$  mm (*Pavonia lasiopetala*); and the seed surface areas ranged from  
256  $0.361 \pm 0.0083$  (*Sporobolus cryptandrus*) to  $25.258 \pm 1.322$  (*Polytaenia nuttallii*) mm<sup>2</sup> (Figure  
257 1).

258

### 259 Species Phylogenetic Information

260           We used nonmetric multidimensional scaling (NMDS) to compress the phylogenetic  
261 distance matrix to a two-dimensional space, with a pressure of 17.86. Our results showed that 45  
262 species were grouped into three clusters: Monocot, Asteraceae and eudicots-except Asteraceae  
263 (Figure 3). NMDS compressed phy1 (x-axis) corresponded to separating monocot and eudicots,  
264 while the phy2 (y-axis) separated Asteraceae from other families.

265           Our measurements of phylogenetic signals, Blomberg's K (using species shuffling  
266 method), were low for all four seed traits, indicating a departure from signal under strict  
267 Brownian motion and suggesting that these traits are evolutionarily labile. Although Blomberg's  
268 K were low, indicating a weak phylogenetic signal, we found significant phylogenetic signals for  
269 seed mass (K = 0.07, p = 0.01) and seed height (K = 0.05, p = 0.05) (Table 2).

270

### 271 Germinability Prediction Model Selection

272         The full set of models built from morphological traits and phylogenetic information were  
273 evaluated using adjusted AIC (AICc). The AICc values range from 129.9 to 139.4. The best  
274 prediction model is using seed height to predict seed germination (AICc = 129.9), slightly better  
275 than the model using seed mass to predict germination (AICc = 130.5). The models with low  
276 AICc values were clustered by using one morphological trait as a predictor or the combination of  
277 two morphological traits. This indicated that morphological traits out-perform phylogenetic  
278 distance in predicting seed germination. Pearson correlation coefficient analysis revealed a  
279 strong correlation between seed mass and seed height ( $r = 0.66$ ,  $p < 0.01$ ); a medium correlation  
280 between seed mass and seed surface area ( $r = 0.49$ ,  $p < 0.01$ ); no correlation was detected  
281 between seed height and seed surface area.

282

### 283 Random Sub-sampling of Different Species Pool Size

284         We calculated phylogenetic signals of morphological traits (seed mass, seed height, and  
285 seed surface area) and seed germination rate of all 3,100 sub-pools. All Blomberg's K values  
286 were between 0 and 1 in all phylogenetic signal calculations, except 9 of them were larger than  
287 1. In general, phylogenetic signals distributed widely at small species pool sizes, and became less  
288 varied while increasing species pool sizes (Figure 4). For seed height, seed surface area, and seed  
289 germination, the probability of detecting phylogenetic signals were consistently low regardless of  
290 the species pool size. This was true even for seed height, for which we detected a significant  
291 phylogenetic signal in our full dataset. In contrast, the probability of detecting the phylogenetic  
292 signal of seed mass increased with species pool size (Figure 5).

293

294 **Discussion:**

295         Aiming to verify the usefulness of trait conservatism in restoration seed selection, we  
296 measured seed traits, ran seed germination tests, calculated phylogenetic signals in seed traits,  
297 and presented the phylogenetic residual in seed germinability prediction models. We quantified  
298 weak phylogenetic signals in seed mass and seed height, but we found no phylogenetic signal in  
299 seed surface area nor in seed final germination percentage. In those traits that did exhibit  
300 phylogenetic signals, the signals were weak: closely related species were more similar than  
301 expected under species shuffling, but more different in their trait values than expected under  
302 Brownian motion.

303

304 Phylogenetic Tree

305         The phylogenetic tree of 45 commonly selected species in shortgrass prairie ecological  
306 restoration was clustered in Poaceae within monocots and were relatively clustered in Asteraceae  
307 and Lamiaceae within eudicots (Figure 3), which reflects that the species composition may be  
308 clustered in shortgrass prairie. The phylogenetic comparative methods displayed trait values  
309 indicated that the closely related species had similar trait values in seed mass and seed height,  
310 but not in seed germination (Figure 1). The NMDS compressing phylogenetic distance into two-  
311 dimensions shows three distinct clusters (Figure 3). The results showed that shortgrass prairie  
312 families were grouped into 3 clusters: one monocot group and two eudicot groups (Asteraceae  
313 and others, Figure 3). Meanwhile the tallgrass prairie species (Barak *et al.* 2018) were grouped  
314 into 4 clusters: one monocot group, three eudicot groups (Asteraceae, Fabaceae, and others).

315 Our development of the Shiny application demonstrated: (1) the procedure of pruning the  
316 synthetic phylogenetic tree (Zanne et al. 2014) to the desired species tree (Figure 1). (2) the  
317 calculation of compressing phylogenetic distance into two-dimensions. The interactive  
318 demonstration allows users to select all or a portion of desired species and understand the effect  
319 of species selection on phylogenetic calculation.

320

### 321 Phylogenetic Signal in Traits

322 Phylogenetic signal indicates that closely related species have more similar trait value  
323 than expected under species shuffling across tips of a phylogeny. We found significant  
324 phylogenetic signals in seed mass and seed height, but no such signals in seed surface area nor in  
325 seed final germination percentage. Although germination traits are not specific or constant in  
326 each species (but vary in space and time), since we chose seeds from the same eco-region, our  
327 results are able to represent our region and still allow generalization when considering  
328 germinability predictions. Generally, seed mass is phylogenetically conserved in sample taxa  
329 from different ecosystems (tallgrass prairie, Barak et al. 2018; alpine grassland, Bu *et al.* 2016;  
330 and globally, Westoby et al. 2002). In our set of taxa, we found a weak but significant pattern.  
331 Seed mass often predicts energy and nutrient provisioning (Westoby *et al.* 2002), which  
332 increases seed germination rates and stress tolerance (Leishman 2000; Moles 2018). This  
333 assumes, however, that mass is primarily the embryo and nutrients. It is possible for a large  
334 portion of the seed mass to be seed defense structures (i.e. seed coat).

335 We used seed height and seed surface area as proxies for seed dispersal syndrome,  
336 because these dimensions influence primary wind dispersal (seed departure from mother plants,  
337 Sheldon and Burrows 1973; Jongejans and Telenius 2001) and secondary wind dispersal (seed

338 lifting off ground by wind power, van Tooren 1988; Schurr *et al.* 2005; Zhu *et al.* 2022). Primary  
339 dispersal is mainly related to dispersal height and terminal falling velocity, which is influenced  
340 by seed morphology (Sheldon and Burrows 1973; Jongejans and Telenius 2001). Secondary  
341 dispersal distance strongly depends on the lift-off velocity, which is influenced by seed height  
342 and the planform area of a seed exposed to airflow (van Tooren 1988; Schurr *et al.* 2005; Zhu *et*  
343 *al.* 2022). Classically, seed shape was measured by the roundness or closeness of a seed to  
344 specific shape, such as ellipse or cardioid (Cervantes *et al.* 2016) and linked with seed  
345 persistence in soil seed bank (Moles *et al.* 2000; Laughlin 2014). Some recent studies link seed  
346 morphological shape with evolutionary constraint and selective pressure of seeds and its  
347 potential relationship with seed germination (Barak *et al.* 2018, Bu *et al.* 2016). In our study,  
348 seed mass and seed height were positively correlated. We found a weak pattern of phylogenetic  
349 trait conservatism in two traits, but this signal did not aid in improving seed germinability  
350 prediction models.

351         Seed germination is a complex phenomenon. Our measure of total germination was, in  
352 effect, a dormancy proxy: high germination rates indicated a lack of dormancy in our research.  
353 Our experiment didn't include any dormancy breaking retreatments, only supplying light and  
354 water during experiments to simulate practitioners' low effort practices. Seed germination can be  
355 influenced by abiotic factors, such as wetland species germination impacted by water level  
356 (Keddy 1992); or arid zone woody species developing rapid germination in response to  
357 unpredictable rainfall (Duncan *et al.* 2019). Seed germination can also be influenced by biotic  
358 factors, such as small- and large-seeded species diverging in the species they associate with,  
359 regarding seed mass and understory light preference (Umaña *et al.* 2020). We didn't detect a  
360 phylogenetic signal in germination rate indicating this trait is highly labile. This result was



361 different from a similar study of tallgrass prairie species (Barak *et al.* 2018), where the authors  
362 found significant phylogenetic trait conservatism in germination percentage under control and  
363 gibberellic acid treatment, and including phylogeny improve time-to-germination (survival)  
364 model. However, the survival model (Barak *et al.* 2018) includes both germination time and  
365 pretreatment for germination rate and doesn't measure dormancy. Differing patterns in  
366 phylogenetic signal in germination rate of two prairie studies are reasonable, in consideration of  
367 environmental differences between two different ecosystems, and the germination experiment  
368 setting in two studies.

369

#### 370 Germinability Prediction Model Selection

371 The germinability predictive models with morphological data did not improve when  
372 adding phylogenetic information using the full dataset (Supplemental Material). This means  
373 adding phylogenetic information to morphological measurements increased the complexity of  
374 models but did not increase the fitness of models. This is not surprising given that we found no  
375 phylogenetic signal in seed germination rate and only weak signals in two other traits.

376

#### 377 Random Sub-sampling of Different Species Pool Size

378 From the distribution of Blomberg's K, we can tell the species sample size will greatly  
379 influence phylogenetic signal calculation (Blomberg *et al.* 2003). Our shortgrass prairie  
380 restoration species results showed that the phylogenetic signal would be less impacted by the  
381 species composition, and less varied with sufficient species, around 35 to 40 (Figure 4). This also  
382 indicates the 45 species we have in our study is sufficient.

383           In the full dataset (45 species), we were able to detect phylogenetic signals for both seed  
384 mass and seed height. However, the subsampling exploration method demonstrates that detecting  
385 a phylogenetic signal in seed height is a low probability event. On the other hand, our sub-  
386 sampling in seed mass showed that the probability of detecting a phylogenetic signal increased  
387 along with the increase in the number of species in the species pool. The Blomberg's K value is  
388 stable at 40 species, which could indicate that if researchers or practitioners have over 40 species  
389 sub-sampling of shortgrass prairie restoration species, their studies should be able to detect  
390 phylogenetic signals. The random sampling methods to verify sample size method could apply in  
391 sampling species to estimate phylogenetic conservatism in plant communities.

392

### 393 Shiny Application

394           From the Shiny application, restoration practitioners could use interactive methods to  
395 explore our data and statistical analysis and results visualization. For readers who are first  
396 exposed to phylogenetic comparative methods, the interactive graphic user interface can lower  
397 the bar for exploring our data, as well as increase engagement. Our checkbox of species list  
398 allows users to design their composition of species, and to investigate the impact of species  
399 choice on phylogenetic signal and germinability prediction. Our Shiny application was published  
400 on GitHub website ([https://github.com/chenyanniii/Traits\\_Shiny](https://github.com/chenyanniii/Traits_Shiny), DOI:  
401 [10.5281/zenodo.6609191](https://doi.org/10.5281/zenodo.6609191)) and on shinyapps.io  
402 ([https://chenyanniii.shinyapps.io/Phylo\\_Compar\\_Traits/](https://chenyanniii.shinyapps.io/Phylo_Compar_Traits/)).

403

### 404 Comparison Between Tallgrass Prairie and Shortgrass Prairie Studies

405           Seed germination is a complex physiological phenomenon that could be studied for its  
406 optimization using dormancy breaking treatments (Barak et al. 2018), as well as could be a  
407 dormancy proxy, such as high germination rates indicated a lack of dormancy in our research.  
408 Our research can be contrasted with a was similar tallgrass prairie study (Barak et al. 2018), in  
409 which: (1) the phylogenetic signals of germination were detected in morphological traits and  
410 seed germination percentage; (2) phylogenetic information improves the seed germinability  
411 prediction model. We saw the potential of applying phylogenetic information in ecological  
412 restoration, so we tested the phylogenetic application in simply restoration setting: (1) We  
413 selected regional appropriated seed sources from a local restoration vendor. (2) We proxy  
414 dormancy in seed sources by running germination trails without any dormancy breaking  
415 treatment to approximate the conditions preferred by restoration practitioners. (3) We tested our  
416 results against null models: confirming our confidence in sample size, examining the robustness  
417 of our conclusion while ensuring we can generalize results for the whole shortgrass prairie plant  
418 community. Our unique restoration scenario of shortgrass prairie showed a few advancements of  
419 knowledge. First, only seed mass and seed height detected phylogenetic signals in 45 species.  
420 The phylogenetic signal in seed mass is well preserved and can be generalized to estimate the  
421 phylogenetic signal for the shortgrass prairie plant community. On the opposite, detecting a  
422 phylogenetic signal in seed height is a low chance event that the phylogenetic signal in 45  
423 species should not be generalized to estimate the phylogenetic signal for the shortgrass prairie  
424 plant community. Second, estimating phylogenetic signals for a plant community needs a larger  
425 sample size than a single fixed group. The shortgrass prairie plant community needs at around 40  
426 species for detecting a general pattern (Figure 4 and Figure 5), which is twice of the twenty  
427 species assumption in a fixed species comparative study (Blomberg et al. 2003).

428

## 429 **Conclusion and Future Studies**

430 Overall, we have demonstrated that the phylogenetic signal calculation can be influenced  
431 by size and composition of seed pool. We recommend running a sub-sampling test to verify the  
432 sufficiency of species and phylogenetic conservatism in traits for a community study, and we  
433 proposed a general protocol for implementing phylogenetic conservatism in plant community  
434 restoration (Figure 6). Our Shiny application is on GitHub website  
435 ([https://github.com/chenyanniii/Traits\\_Shiny](https://github.com/chenyanniii/Traits_Shiny), DOI: 10.5281/zenodo.6609191) and on  
436 shinyapps.io ([https://chenyanniii.shinyapps.io/Phylo\\_Compar\\_Traits/](https://chenyanniii.shinyapps.io/Phylo_Compar_Traits/)), using an interactive way  
437 to demonstrate how species composition directly impacts the phylogenetic signal calculation.

438 Our work demonstrated that morphological traits (seed mass and seed height) are highly  
439 conserved traits in shortgrass prairie, North America. Yet our study could not detect the benefit  
440 of adding phylogenetic information using morphological traits to predict seed germination. The  
441 inconsistent role of phylogeny in different ecosystems needs further exploration, especially  
442 taking advantage of large standard databases of seed traits and the tree of life.

443 **References**

- 444 Agrawal AA. 2007. Macroevolution of plant defense strategies. *Trends Ecol Evol* **22**: 103–9.
- 445 Akaike H. 1998. Information Theory and an Extension of the Maximum Likelihood Principle. In: Parzen  
446 E, Tanabe K, Kitagawa G (Eds). Selected Papers of Hirotugu Akaike. New York, NY: Springer New  
447 York.
- 448 Barak RS, Lichtenberger TM, Wellman-Houde A, *et al.* 2018. Cracking the case: Seed traits and  
449 phylogeny predict time to germination in prairie restoration species. *Ecol Evol* **8**: 5551–62.
- 450 Baskin CC and Baskin JM. 1998. Seeds: ecology, biogeography, and evolution of dormancy and  
451 germination. Academic press.
- 452 Baum DA and Smith SD. 2013. Tree thinking: an introduction to phylogenetic biology. Roberts  
453 Greenwood Village (CO).
- 454 Blomberg SP, Garland T Jr, and Ives AR. 2003. Testing for phylogenetic signal in comparative data:  
455 behavioral traits are more labile. *Evolution* **57**: 717–45.
- 456 Bradford KJ. 2002. Applications of hydrothermal time to quantifying and modeling seed germination and  
457 dormancy. *Weed Sci* **50**: 248–60.
- 458 Bu H-Y, Wang X-J, Zhou X-H, *et al.* 2016. The ecological and evolutionary significance of seed shape  
459 and volume for the germination of 383 species on the eastern Qinghai-Tibet plateau. *Folia Geobot*  
460 **51**: 333–41.
- 461 Chou Y-F, Cox RD, and Wester DB. 2012. Smoke Water and Heat Shock Influence Germination of  
462 Shortgrass Prairie Species. *Rangeland Ecol Manage* **65**: 260–7.
- 463 Duncan C, Schultz N, Lewandrowski W, *et al.* 2019. Lower dormancy with rapid germination is an

- 464 important strategy for seeds in an arid zone with unpredictable rainfall. *PLoS One* **14**: e0218421.
- 465 Finch-Savage WE and Leubner-Metzger G. 2006. Seed dormancy and the control of germination. *New*  
466 *Phytol* **171**: 501–23.
- 467 Ganade G and Westoby M. 1999. Seed Mass and the Evolution of Early-Seedling Etiolation. *Am Nat* **154**:  
468 469–80.
- 469 Garamszegi LZ. 2014. Uncertainties Due to Within-Species Variation in Comparative Studies:  
470 Measurement Errors and Statistical Weights. In: Garamszegi LZ (Ed). *Modern Phylogenetic*  
471 *Comparative Methods and Their Application in Evolutionary Biology: Concepts and Practice*.  
472 Berlin, Heidelberg: Springer Berlin Heidelberg.
- 473 Hardegree SP, Moffet CA, Flerchinger GN, *et al.* 2013. Hydrothermal Assessment of Temporal  
474 Variability in Seedbed Microclimate. *Rangeland Ecol Manage* **66**: 127–35.
- 475 Hipp AL, Larkin DJ, Barak RS, *et al.* 2015. Phylogeny in the service of ecological restoration. *Am J Bot*  
476 **102**: 647–8.
- 477 Hladik A and Miquel S. 1990. Seedling types and plant establishment in an African rain forest.  
478 *Reproductive ecology of tropical forest plants* **7**: 1990.
- 479 Howe HF and Smallwood J. 1982. Ecology of Seed Dispersal. *Annu Rev Ecol Syst* **13**: 201–28.
- 480 Jager M, Kaphingst B, Janse EL, *et al.* 2019. Seed size regulates plant dispersal distances in flowing  
481 water (C Nilsson, Ed). *J Ecol* **107**: 307–17.
- 482 Jongejans E and Telenius A. 2001. Field experiments on seed dispersal by wind in ten umbelliferous  
483 species (Apiaceae). *Plant Ecol* **152**: 67–78.
- 484 Keddy PA. 1992. A Pragmatic Approach to Functional Ecology. *Funct Ecol* **6**: 621–6.

- 485 Kidson R and Westoby M. 2000. Seed mass and seedling dimensions in relation to seedling  
486 establishment. *Oecologia* **125**: 11–7.
- 487 Kiehl K, Kirmer A, Donath TW, *et al.* 2010. Species introduction in restoration projects – Evaluation of  
488 different techniques for the establishment of semi-natural grasslands in Central and Northwestern  
489 Europe. *Basic Appl Ecol* **11**: 285–99.
- 490 Kitajima K. 1996a. Ecophysiology of Tropical Tree Seedlings. In: Mulkey SS, Chazdon RL, Smith AP  
491 (Eds). *Tropical Forest Plant Ecophysiology*. Boston, MA: Springer US.
- 492 Kitajima K. 1996b. Cotyledon functional morphology, patterns of seed reserve utilization and  
493 regeneration niches of tropical tree seedlings. In “The ecology of tropical forest tree seedlings”.(Ed.  
494 MD Swaine) pp. 193--210.
- 495 Larson JE, Sheley RL, Hardegree SP, *et al.* 2015. Seed and seedling traits affecting critical life stage  
496 transitions and recruitment outcomes in dryland grasses (M Cadotte, Ed). *J Appl Ecol* **52**: 199–209.
- 497 Laughlin DC. 2014. The intrinsic dimensionality of plant traits and its relevance to community assembly.  
498 *J Ecol* **102**: 186–93.
- 499 Leishman MR, Wright IJ, Moles AT, *et al.* 2000. The evolutionary ecology of seed size. *Seeds: the*  
500 *ecology of regeneration in plant communities* **2**: 31–57.
- 501 Martins EP and Hansen TF. 1997. Phylogenies and the Comparative Method: A General Approach to  
502 Incorporating Phylogenetic Information into the Analysis of Interspecific Data. *Am Nat* **149**: 646–67.
- 503 Mazerolle MJ. 2020. AICcmodavg-package: Model Selection and Multimodel Inference Based on  
504 (Q)AIC(c) in AICcmodavg: Model Selection and Multimodel Inference Based on  
505 (Q)AIC(c)<https://rdrr.io/cran/AICcmodavg/man/AICcmodavg-package.html>. Viewed 30 Apr 2022.
- 506 Moles AT. 2018. Being John Harper: Using evolutionary ideas to improve understanding of global

- 507 patterns in plant traits. *J Ecol* **106**: 1–18.
- 508 Moles AT, Hodson DW, and Webb CJ. 2000. Seed Size and Shape and Persistence in the Soil in the New  
509 Zealand Flora. *Oikos* **89**: 541–5.
- 510 Paradis E and Schliep K. 2019. ape 5.0: an environment for modern phylogenetics and evolutionary  
511 analyses in R. *Bioinformatics* **35**: 526–8.
- 512 Revell LJ. 2010. Phylogenetic signal and linear regression on species data. *Methods in Ecology and*  
513 *Evolution* **1**: 319–29.
- 514 Revell LJ. 2012. phytools: an R package for phylogenetic comparative biology (and other things).  
515 *Methods Ecol Evol* **3**: 217–23.
- 516 Revell LJ, Harmon LJ, and Collar DC. 2008. Phylogenetic signal, evolutionary process, and rate. *Syst*  
517 *Biol* **57**: 591–601.
- 518 Schurr FM, Bond WJ, Midgley GF, and Higgins SI. 2005. A mechanistic model for secondary seed  
519 dispersal by wind and its experimental validation. *J Ecol* **93**: 1017–28.
- 520 Schwilk DW and Zavala N. 2012. Germination response of grassland species to plant-derived smoke. *J*  
521 *Arid Environ* **79**: 111–5.
- 522 Sheldon JC and Burrows FM. 1973. The dispersal effectiveness of the achene-Pappus units of selected  
523 compositae in steady winds with convection. *New Phytol* **72**: 665–75.
- 524 Subbiah A, Ramdhani S, Pammenter NW, *et al.* 2019. Towards understanding the incidence and  
525 evolutionary history of seed recalcitrance: An analytical review. *Perspect Plant Ecol Evol Syst* **37**:  
526 11–9.
- 527 Tooren BF van. 1988. The Fate of Seeds after Dispersal in Chalk Grassland: The Role of the Bryophyte



- 528 Layer. *Oikos* **53**: 41–8.
- 529 Umaña MN, Arellano G, Forero-Montaña J, *et al.* 2020. Large- and small-seeded species have contrasting  
530 functional neighborhoods in a subtropical forest. *Ecosphere* **11**: 314.
- 531 Venables WN and Ripley BD. 2002. *Modern Applied Statistics with S*. Springer, New York, NY.
- 532 Westoby M, Falster DS, Moles AT, *et al.* 2002a. Plant ecological strategies: some leading dimensions of  
533 variation between species. *Annu Rev Ecol Syst*: 125–59.
- 534 Willis CG, Baskin CC, Baskin JM, *et al.* 2014. The evolution of seed dormancy: environmental cues,  
535 evolutionary hubs, and diversification of the seed plants. *New Phytol* **203**: 300–9.
- 536 Zanne AE, Tank DC, Cornwell WK, *et al.* 2014. Three keys to the radiation of angiosperms into freezing  
537 environments. *Nature* **506**: 89–92.
- 538 Zhu J, Buchmann CM, and Schurr FM. 2022. Effects of seed morphology and orientation on secondary  
539 seed dispersal by wind. *J Plant Ecol*.
- 540 Zhu J, Liu M, Xin Z, *et al.* 2019. A trade-off between primary and secondary seed dispersal by wind.  
541 *Plant Ecol* **220**: 541–52.

542 Table 1 Forty-five native species were selected in this study, which are commonly involved in  
543 restoration practice and range management in shortgrass prairie. Most of the species were bought  
544 from Native American Seed, tested in controlled environments, 6 species were cited from (Chou  
545 *et al.* 2012)<sup>1</sup> and 5 species were cited from (Schwilk and Zavala 2012)<sup>2</sup>.  
546

| <b>Species</b>                                                         | <b>Family</b>  |
|------------------------------------------------------------------------|----------------|
| <i>Andropogon gerardii</i> Vitman                                      | Poaceae        |
| <i>Argemone albiflora</i> Hornem.                                      | Papaveraceae   |
| <i>Aristida purpurea</i> Hutt.                                         | Poaceae        |
| <i>Asclepias asperula</i> (Decne.) Woodson                             | Asclepiadaceae |
| <i>Astragalus crassicaarpus</i> Nutt. <sup>1</sup>                     | Fabaceae       |
| <i>Bouteloua curtipendula</i> (Michx.) Torr.                           | Poaceae        |
| <i>Bouteloua gracilis</i> (Willd. ex Kunth) Lag. ex Griffiths          | Poaceae        |
| <i>Callirhoe involucrata</i> (Torr. & A. Gray) A. Gray                 | Malvaceae      |
| <i>Callirhoe leiocarpa</i> R.F. Martin                                 | Malvaceae      |
| <i>Centaurea americana</i> Nutt.                                       | Asteraceae     |
| <i>Chasmanthium latifolium</i> (Michx.) Yates                          | Poaceae        |
| <i>Chloris cucullata</i> Bisch.                                        | Poaceae        |
| <i>Coreopsis lanceolata</i> L. <sup>2</sup>                            | Asteraceae     |
| <i>Coreopsis tinctoria</i> Nutt.                                       | Asteraceae     |
| <i>Corydalis curvisiliqua</i> Engelm.                                  | Fumariaceae    |
| <i>Desmanthus illinoensis</i> (Michx.) MacMill. ex B.L. Rob. & Fernald | Fabaceae       |
| <i>Digitaria californica</i> (Benth.) Henr.                            | Poaceae        |
| <i>Digitaria ciliaris</i> (Retz.) Koeler                               | Poaceae        |
| <i>Echinacea angustifolia</i> DC. <sup>2</sup>                         | Asteraceae     |
| <i>Eragrostis trichodes</i> (Nutt.) Alph. Wood                         | Poaceae        |
| <i>Eryngium leavenworthii</i> Torr. & A. Gray                          | Apiaceae       |

|                                                                                     |                  |
|-------------------------------------------------------------------------------------|------------------|
| <i>Gutierrezia sarothrae</i> (DC.) A. Gray                                          | Asteraceae       |
| <i>Helianthus annuus</i> L.                                                         | Asteraceae       |
| <i>Herbertia lahue</i> (Molina) Goldblatt                                           | Iridaceae        |
| <i>Ipomopsis rubra</i> (L.) Wherry                                                  | Polemoniaceae    |
| <i>Liatris mucronata</i> Hook. var. <i>mucronata</i> (DC.) B.L. Turner <sup>2</sup> | Asteraceae       |
| <i>Linum rigidum</i> Pursh                                                          | Linaceae         |
| <i>Monarda citriodora</i> Cerv. ex Lag.                                             | Lamiaceae        |
| <i>Oenothera rhombipetala</i> Nutt. ex Torr. & A. Gray                              | Onagraceae       |
| <i>Pavonia lasiopetala</i> Scheele                                                  | Malvaceae        |
| <i>Penstemon cobaea</i> Nutt. <sup>2</sup>                                          | Scrophulariaceae |
| <i>Phacelia congesta</i> Hook.                                                      | Hydrophyllaceae  |
| <i>Phytolacca americana</i> L.                                                      | Phytolaccaceae   |
| <i>Polytaenia nuttallii</i> DC.                                                     | Apiaceae         |
| <i>Ratibida columnifera</i> (Nutt.) Wooton & Standl.                                | Asteraceae       |
| <i>Rivina humilis</i> L.                                                            | Phytolaccaceae   |
| <i>Salvia azurea</i> Michx. ex Lam.                                                 | Lamiaceae        |
| <i>Salvia coccinea</i> P.J. Buchoz ex Etlinger <sup>2</sup>                         | Lamiaceae        |
| <i>Salvia farinacea</i> Benth.                                                      | Lamiaceae        |
| <i>Salvia lyrata</i> L.                                                             | Lamiaceae        |
| <i>Schizachyrium scoparium</i> (Michx.) Nash                                        | Poaceae          |
| <i>Sorghastrum nutans</i> (L.) Nash                                                 | Poaceae          |
| <i>Sporobolus airoides</i> (Torr.) Torr.                                            | Poaceae          |
| <i>Sporobolus cryptandrus</i> (Torr.) A. Gray                                       | Poaceae          |
| <i>Tradescantia occidentalis</i> (Britton) Smyth                                    | Commelinaceae    |

548 **Figure 1** Phylogenetic tree of species and species seed traits values (seed mass, seed height)  
549 distribution along the phylogenetic tree. Phylogenetic tree was generated from the pruned Zanne  
550 et al. tree (Zanne *et al.* 2014), including 15 species (*Astragalus crassicaarpus*, *Argemone*  
551 *albiflora*, *Asclepias Asperula*, *Callirhoe leiocarpa*, *Centaurea americana*, *Chasmanthium*  
552 *tifolium*, *Corydalis curvisiliqua*, *Digitaria californica*, *Eragrostis trichodes*, *Herbertia lahue*,  
553 *Linum rigidum*, *Pavonia lasiopetala*, *Polytaenia nuttallii*, *Tradescantia occidentalis*, *Liatris*  
554 *mucronata*) were placed within under the same genus/family. The center of each plot is the mean  
555 value, the other two lines are  $-/+$  standard errors. The colors were coded corresponding to the  
556 grouping of phylogenetic positions (Figure 3).  
557

558 **Figure 2** Shiny application of interactive learning of phylogenetic comparative methods. This is  
559 a screenshot of the shiny application. The checkbox of species could be used to choose different  
560 combinations of species and explore its impact on phylogenetic signals.  
561

562 **Figure 3** Phylogenetic position of 45 species, represented by family, were clustered in three  
563 groups. The phylogenetic positions were generated from paired-wise distances of species on the  
564 phylogenetic tree (see Figure 1). The nonmetric multidimensional scale (NMDS) was applied, at  
565 the stress of 17.86, displayed in two axes. For the convenience of display the phylogenetic  
566 positions were grouped and color coded by vision.  
567

568 **Figure 4** The distribution of Blomberg's K along the size of the species pool in random  
569 subsampling tests. The species were resampled 100 times from 10 species to 40 species, and  
570 phylogenetic signal (Blomberg's K) was calculated for each trait, 3100 times for each trait.  
571 Phylogenetic signals of (A) seed surface area, (B) germination percentage, (C) seed height, (D)  
572 seed mass. The dots represent the Blomberg's K value of each resampling pool. The color of dots  
573 indicates the p-value of Blomberg's K ( $p \leq 0.05$ , black;  $p > 0.05$ , grey).  
574

575 **Figure 5** The proportion of subsamples with significant phylogenetic signals along the change of  
576 number of species in species pools. The species were resampled 100 times from 10 species to 40  
577 species. The dots represent the proportion of Blomberg's K value ( $p \leq 0.05$ ) in each resampling  
578 pool: (A) seed surface area, (B) germination percentage, (C) seed height, (D) seed mass.  
579

580 **Figure 6** General protocol for generating a germinability prediction model with phylogenetic  
581 information for a plant community. This model needs a pool species with phylogenetic  
582 information, morphological data and germination data to build. It will be able to explore the  
583 germination pattern of the community.  
584

585

586 Table 2 Phylogenetic signal was tested in seed morphological traits and overall seed final  
587 germination percentage. Blomberg's K was used to evaluate phylogenetic signals (Blomberg et  
588 al. 2003).

589

| Trait                             | Blomberg's K | P-value     |
|-----------------------------------|--------------|-------------|
| Seed Mass                         | <b>0.07</b>  | <b>0.01</b> |
| Seed Height                       | <b>0.05</b>  | <b>0.05</b> |
| Seed Surface Area                 | 0.03         | 0.14        |
| Seed Final Germination Percentage | 0.02         | 0.20        |

590 K = 1, the traits is perfectly fit with Brownian motion model

591 K > 1, the traits is more conserved than expected comparing to Brownian motion model

592 K < 1, the traits is less conserved than expected comparing to Brownian motion model

593 \* indicate traits containing phylogenetic signal (P =< 0.05)

594

595

596

597

598

599

600

601

602

603

604

605 **Glossary**

606

607 **Phylogeny / Phylogenetic tree:** branching evolutionary histories / to graphs that represent these  
608 evolutionary histories. Phylogenetic tree including gene tree and species tree. In this paper, we  
609 only refer to species' tree (Baum and Smith 2013).

610 **Phylogenetic conservatism:** the hypothesis that closely related species share more traits than  
611 distantly related species. (Agrawal 2007).

612 **Phylogenetic position:** the relative position between species commonly used nearest neighbor  
613 and paired-wise distance. We used paired-wise distance in our calculation.

614 **Phylogenetic signal:** to describe a tendency for evolutionarily related organisms, under  
615 assumption of following a certain evolutionary model, to resemble each other. (Blomberg *et al.*  
616 2003).

617 **Phylogenetic residual:** incorporate the phylogeny through error structure, such as estimating  
618 ancestral states, rates of evolution, phylogenetic effects. (Garamszegi 2014).

619 **Supplemental Material:** Model Evaluation for all seed germinability prediction models. AICc is  
620 the adjusted AIC value due to the small sample size in biological tests.

621

622

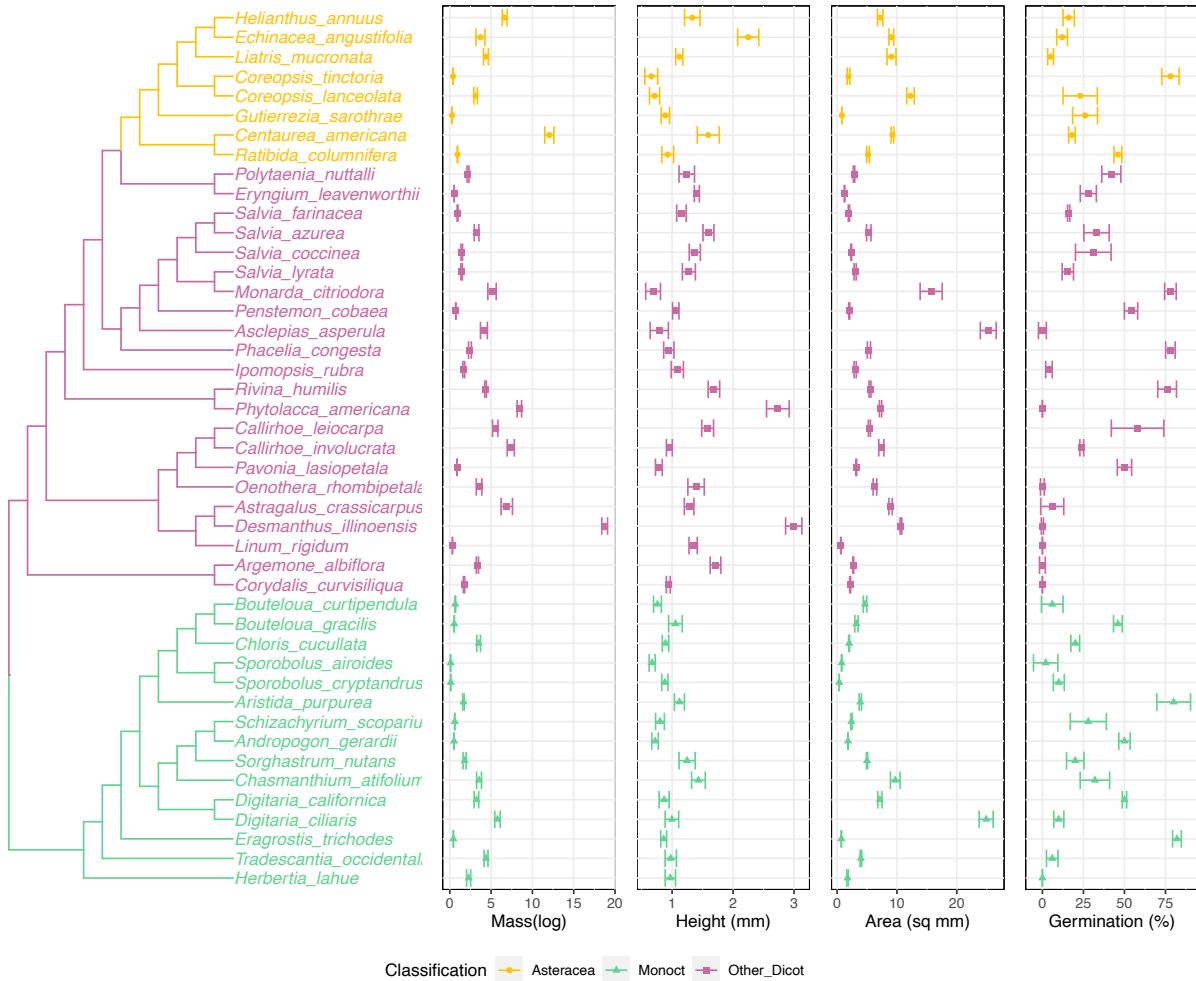

**Figure 1** Phylogenetic tree of species and species seed traits values (seed mass, seed height) distribution along the phylogenetic tree. Phylogenetic tree was generated from the pruned Zanne et al. tree (Zanne et al. 2014), including 15 species (*Astragalus crassicarpus*, *Argemone albiflora*, *Asclepias Asperula*, *Callirhoe leiocarpa*, *Centaurea americana*, *Chasmanthium tifolium*, *Corydalis curvisiliqua*, *Digitaria californica*, *Eragrostis trichodes*, *Herbertia lahue*, *Linum rigidum*, *Pavonia lasiopetala*, *Polytaenia nuttallii*, *Tradescantia occidentalis*, *Liatris mucronata*) were placed within under the same genus/family. The center of each plot is the mean value, the other two lines are  $\pm$  standard errors. The colors were coded corresponding to the grouping of phylogenetic positions (Figure 3).



## Interactive Learning of Phylogenetic Comparative Methods

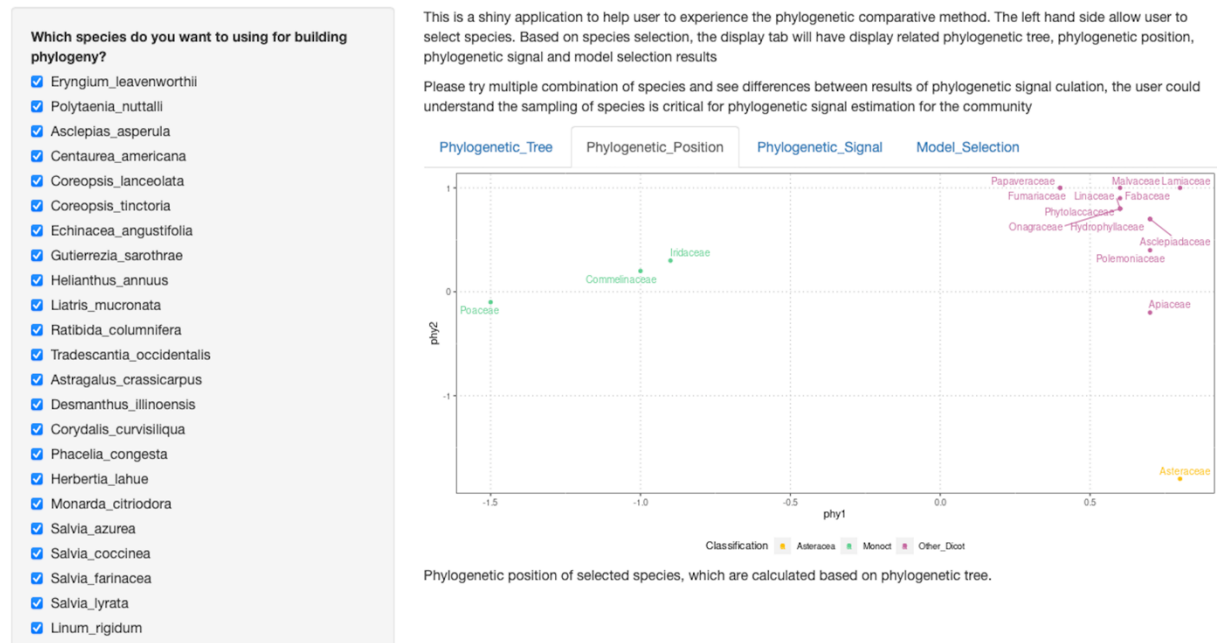

**Figure 2** Shiny application of interactive learning of phylogenetic comparative methods. This is a screenshot of the shiny application. The checkbox of species could be used to choose different combinations of species and explore its impact on phylogenetic signals.

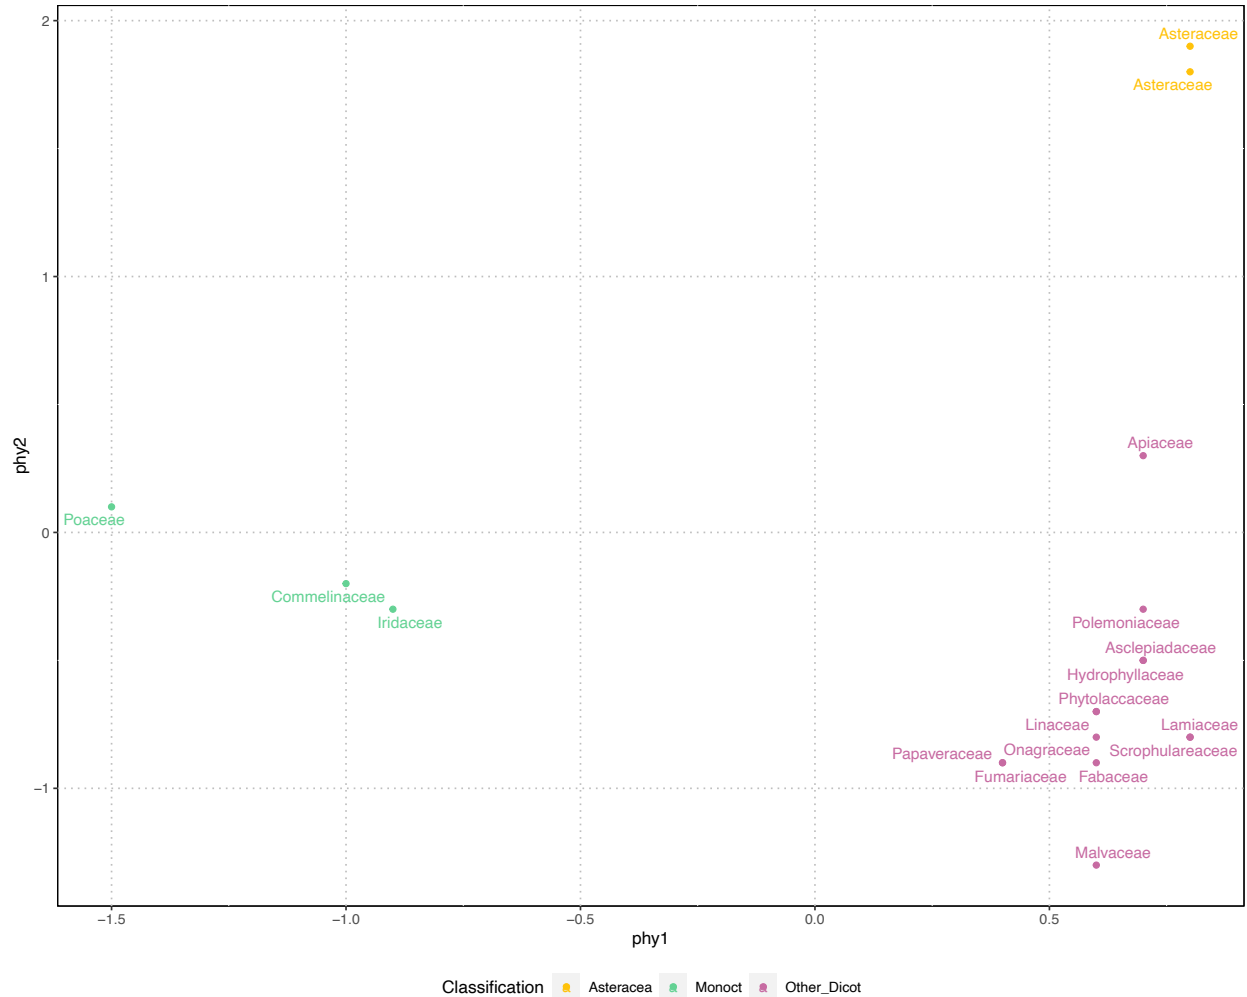

**Figure 3** Phylogenetic position of 45 species, represented by family, were clustered in three groups. The phylogenetic positions were generated from paired-wise distances of species on the phylogenetic tree (see Figure 1). The nonmetric multidimensional scale (NMSD) was applied, at the stress of 17.86, displayed in two axes. For the convenience of display the phylogenetic positions were grouped and color coded by vision.

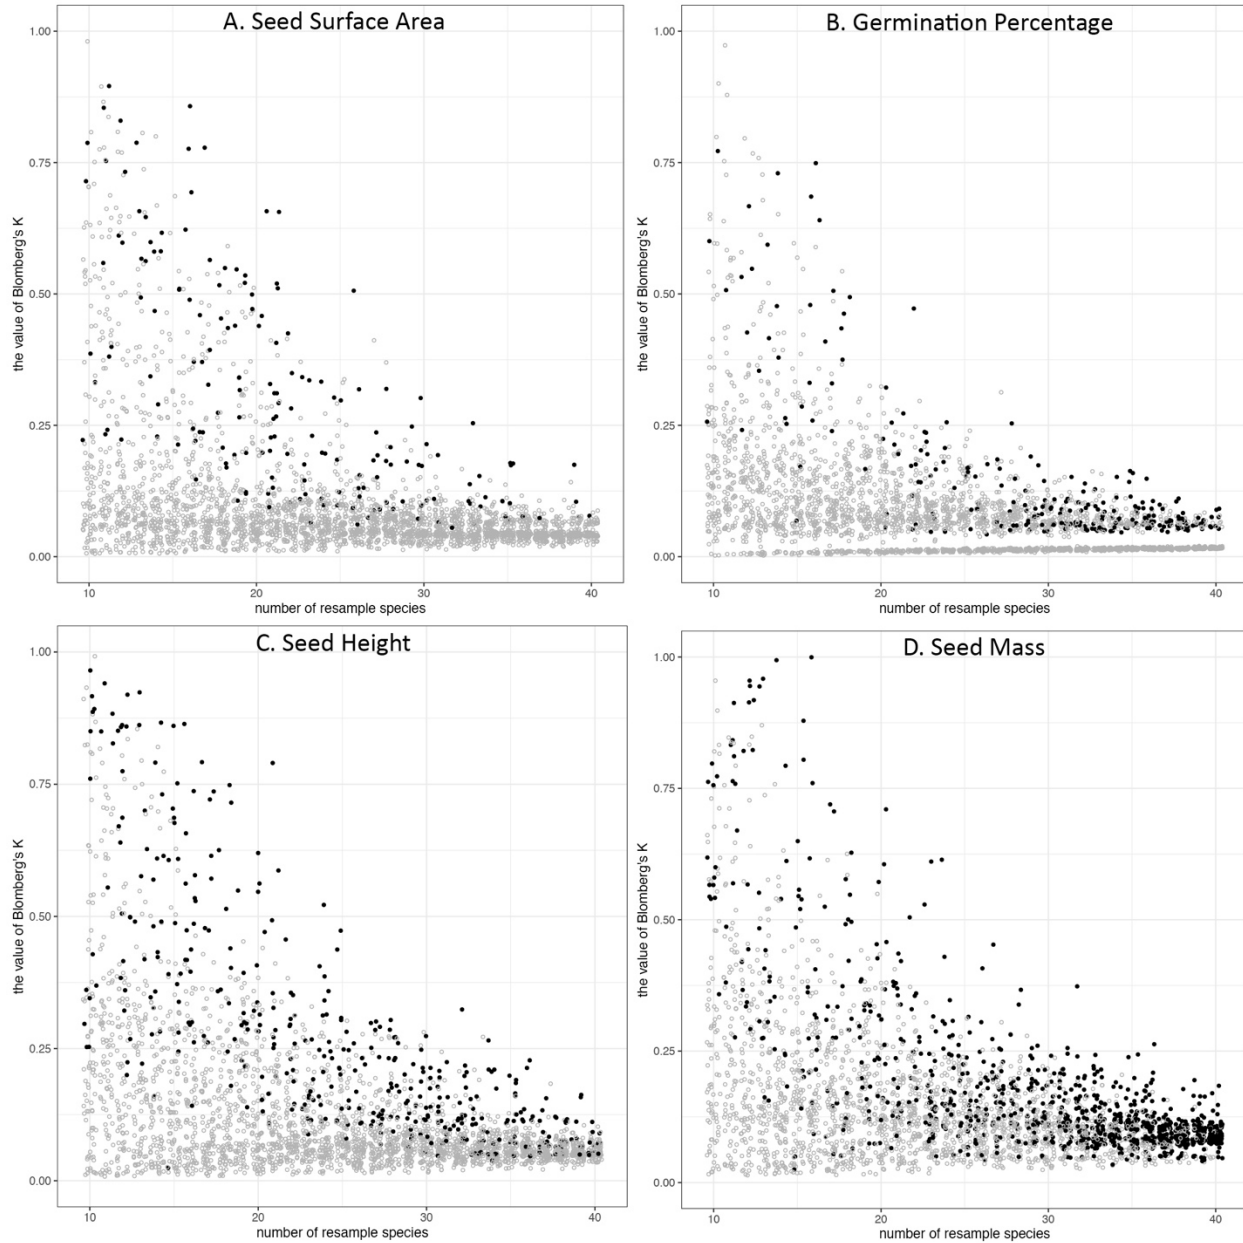

**Figure 4** The distribution of Blomberg's K along the size of the species pool in random subsampling tests. The species were resampled 100 times from 10 species to 40 species, and phylogenetic signal (Blomberg's K) was calculated for each trait, 3100 times for each trait. Phylogenetic signals of (A) seed surface area, (B) germination percentage, (C) seed height, (D) seed mass. The dots represent the Blomberg's K value of each resampling pool. The color of dots indicates the p-value of Blomberg's K ( $p \leq 0.05$ , black;  $p > 0.05$ , grey).

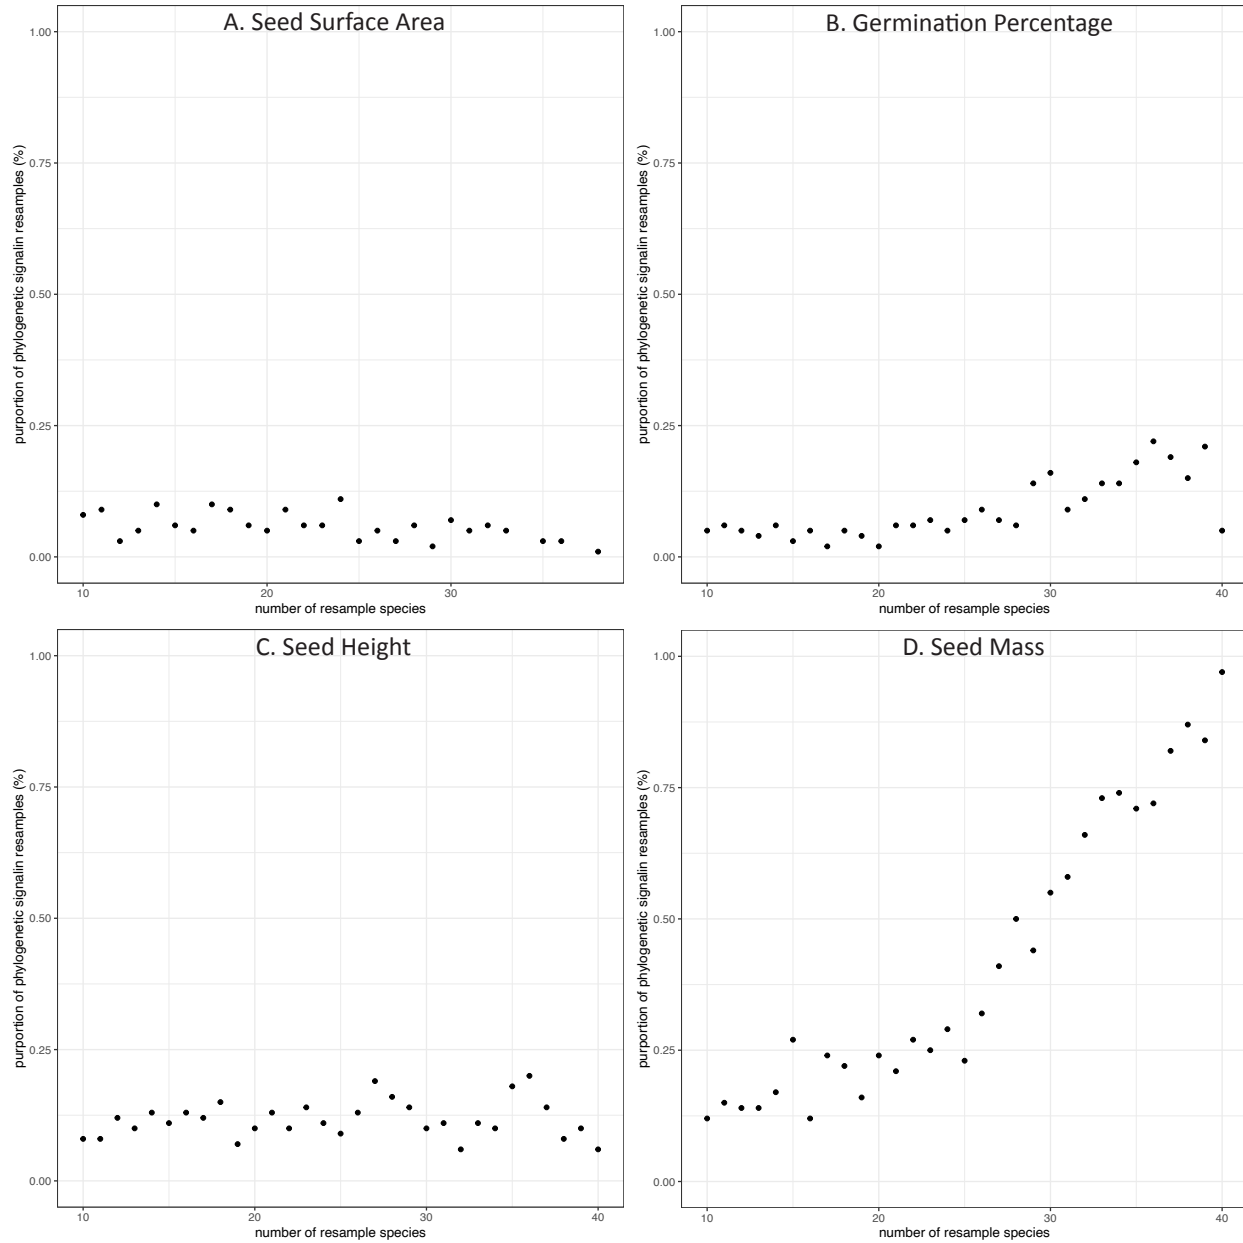

**Figure 5** The proportion of subsamples with significant phylogenetic signals along the change of number of species in species pools. The species were resampled 100 times from 10 species to 40 species. The dots represent the proportion of Blomberg's K value ( $p < 0.05$ ) in each resampling pool: (A) seed surface area, (B) germination percentage, (C) seed height, (D) seed mass.

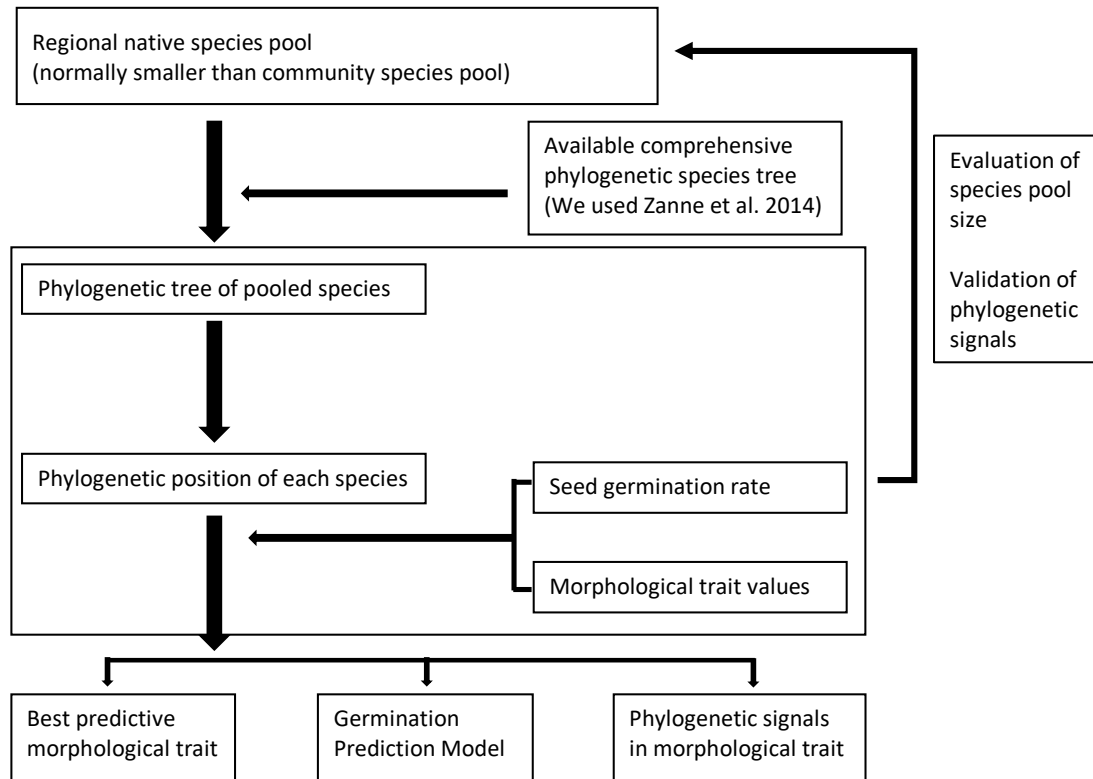

**Figure 6** General protocol for generating a germinability prediction model with phylogenetic information for a plant community. This model needs a pool species with phylogenetic information, morphological data and germination data to build. It will be able to explore the germination pattern of the community.
